# Supplementary material for: Air Quality Modeling of Cooking Stove Emissions and Exposure Assessment in Rural Areas
Source: MDPI journal article supplement (doi:10.3390/su15075676), 2023-03-24
Supplement: s1 [file s1]

Archive with 1 entries (1 files):
- sustainability-2190362-supplementary.pdf
